# Supplementary material for: A new stable luminescent Cd(ii) metal–organic framework with fluorescent sensing and selective dye adsorption properties
Source: Royal Society of Chemistry journal article supplement (doi:10.1039/c8dt01694a), 2018-01-01
Supplement: c8dt01694a1.pdf [file c8dt01694a1.pdf]

*Supporting Information*

**A New Stable Luminescent Cd(II) Metal–Organic  
Framework with Fluorescent Sensing and Selective Dye  
Adsorption Properties**

Wen-Quan Tong, Wei-Ni Liu, Jian-Guo Cheng, Peng-Feng Zhang, Gao-peng Li, Lei Hou\* and Yao-Yu Wang\*

*Key Laboratory of Synthetic and Natural Functional Molecule Chemistry of the Ministry of Education, Shaanxi Key Laboratory of Physico-Inorganic Chemistry, College of Chemistry and Materials Science, Northwest University, Xi'an, Shaanxi 710127, P. R. China. E-mail: wyaoyu@nwu.edu.cn. lhou2009@nwu.edu.cn.*

**Table S1.** Selected bond lengths [Å] and angles [°] for complex **1**.

| <b>1</b>            |           |                      |           |
|---------------------|-----------|----------------------|-----------|
| Cd(1)-O(18)         | 2.172(10) | Cd(3)-O(3)#5         | 2.308(9)  |
| Cd(1)-O(12)#1       | 2.223(9)  | Cd(3)-O(7)           | 2.336(8)  |
| Cd(1)-O(19)         | 2.290(13) | Cd(3)-O(9)           | 2.374(8)  |
| Cd(1)-O(17)         | 2.321(13) | Cd(3)-O(4)#5         | 2.463(8)  |
| Cd(1)-O(15)         | 2.336(9)  | Cd(3)-O(8)           | 2.561(12) |
| Cd(1)-O(16)         | 2.388(9)  | Cd(2)#3-O(5)         | 2.300(8)  |
| Cd(2)-O(5)#2        | 2.299(8)  | Cd(2)#2-O(13)        | 2.420(8)  |
| Cd(2)-O(14)#3       | 2.324(8)  | Cd(2)#2-O(14)        | 2.323(8)  |
| Cd(2)-O(9)          | 2.409(8)  | Cd(3)#5-O(11)        | 2.295(9)  |
| Cd(2)-O(13)#3       | 2.421(8)  | Cd(3)#4-O(4)         | 2.463(8)  |
| Cd(2)-O(7)          | 2.426(9)  | Cd(3)#4-O(3)         | 2.309(9)  |
| Cd(2)-O(10)         | 2.427(9)  | Cd(1)#6-O(12)        | 2.222(9)  |
| Cd(3)-O(11)#4       | 2.295(9)  | Cd(2)-N(1)#2         | 2.326(9)  |
| N(1)-Cd(2)#3        | 2.326(9)  | Cd(3)-N(4)#4         | 2.361(9)  |
| O(18)-Cd(1)-O(19)   | 90.5(5)   | N(4)-Cd(3)#5         | 2.361(9)  |
| O(12)#1-Cd(1)-O(19) | 83.9(6)   | O(18)-Cd(1)-O(12)#1  | 131.8(4)  |
| O(18)-Cd(1)-O(17)   | 94.1(5)   | O(9)-Cd(2)-O(7)      | 76.9(3)   |
| O(12)#1-Cd(1)-O(17) | 88.4(5)   | O(13)#3-Cd(2)-O(7)   | 90.4(3)   |
| O(19)-Cd(1)-O(17)   | 172.3(5)  | O(5)#2-Cd(2)-O(10)   | 130.8(3)  |
| O(18)-Cd(1)-O(15)   | 80.3(3)   | O(14)#3-Cd(2)-O(10)  | 78.8(3)   |
| O(12)#1-Cd(1)-O(15) | 146.8(3)  | O(9)-Cd(2)-O(10)     | 53.3(3)   |
| O(19)-Cd(1)-O(15)   | 88.5(5)   | O(13)#3-Cd(2)-O(10)  | 131.3(3)  |
| O(17)-Cd(1)-O(15)   | 98.4(4)   | O(7)-Cd(2)-O(10)     | 102.5(3)  |
| O(18)-Cd(1)-O(16)   | 136.6(4)  | O(11)#4-Cd(3)-O(3)#5 | 144.6(3)  |

|                       |          |                      |          |
|-----------------------|----------|----------------------|----------|
| O(12)#1-Cd(1)-O(16)   | 90.8(3)  | O(11)#4-Cd(3)-O(7)   | 92.3(3)  |
| O(19)-Cd(1)-O(16)     | 85.8(4)  | O(3)#5-Cd(3)-O(7)    | 122.9(3) |
| O(17)-Cd(1)-O(16)     | 95.0(5)  | O(11)#4-Cd(3)-O(9)   | 94.0(3)  |
| O(15)-Cd(1)-O(16)     | 56.3(3)  | O(3)#5-Cd(3)-O(9)    | 96.0(3)  |
| O(5)#2-Cd(2)-O(14)#3  | 147.8(3) | O(7)-Cd(3)-O(9)      | 79.3(3)  |
| O(5)#2-Cd(2)-O(9)     | 89.2(3)  | O(11)#4-Cd(3)-O(4)#5 | 91.3(3)  |
| O(14)#3-Cd(2)-O(9)    | 122.5(3) | O(3)#5-Cd(3)-O(4)#5  | 54.9(3)  |
| O(5)#2-Cd(2)-O(13)#3  | 92.6(3)  | O(7)-Cd(3)-O(4)#5    | 169.3(3) |
| O(14)#3-Cd(2)-O(13)#3 | 55.2(3)  | O(9)-Cd(3)-O(4)#5    | 90.3(3)  |
| O(9)-Cd(2)-O(13)#3    | 167.3(3) | O(11)#4-Cd(3)-O(8)   | 134.4(4) |
| O(5)#2-Cd(2)-O(7)     | 97.2(3)  | O(3)#5-Cd(3)-O(8)    | 75.1(3)  |
| O(14)#3-Cd(2)-O(7)    | 86.0(3)  | O(7)-Cd(3)-O(8)      | 52.3(3)  |
| O(4)#5-Cd(3)-O(8)     | 129.2(3) | O(9)-Cd(3)-O(8)      | 104.3(4) |

Symmetry transformations used to generate equivalent atoms: #1:  $x+1/2, -y+1/2, z+1/2$ ; #2:  $-x+3/2, y-1/2, -z+1/2$ ; #3:  $-x+3/2, y+1/2, -z+1/2$ ; #4:  $-x+1/2, y+1/2, -z+1/2$ ; #5:  $-x+1/2, y-1/2, -z+1/2$ ; #6:  $x-1/2, -y+1/2, z-1/2$ .

**Table S2** Standard Deviation ( $\delta$ ) calculation for the detection of  $\text{Fe}^{3+}$  for **1**.

| Test                            | Fluorescence intensity (nm) |
|---------------------------------|-----------------------------|
| 1                               | 5408.519                    |
| 2                               | 5407.993                    |
| 3                               | 5407.633                    |
| 4                               | 5408.235                    |
| 5                               | 5408.432                    |
| 6                               | 5407.855                    |
| 7                               | 5407.944                    |
| 8                               | 5407.732                    |
| 9                               | 5408.439                    |
| 10                              | 5408.365                    |
| average                         | 5408.115                    |
| Standard deviation ( $\delta$ ) | 0.315                       |

**Table S3** Standard Deviation ( $\delta$ ) calculation for the detection of  $\text{CrO}_4^{2-}$  for **1**.

| Test                            | Fluorescence intensity (nm) |
|---------------------------------|-----------------------------|
| 1                               | 5697.787                    |
| 2                               | 5696.832                    |
| 3                               | 5696.914                    |
| 4                               | 5696.798                    |
| 5                               | 5697.564                    |
| 6                               | 5697.643                    |
| 7                               | 5696.994                    |
| 8                               | 5697.441                    |
| 9                               | 5697.742                    |
| 10                              | 5697.698                    |
| average                         | 5697.341                    |
| Standard deviation ( $\delta$ ) | 0.408                       |

**Table S4** Standard Deviation ( $\delta$ ) calculation for the detection of  $\text{Cr}_2\text{O}_7^{2-}$  for **1**.

| Test                            | Fluorescence intensity (nm) |
|---------------------------------|-----------------------------|
| 1                               | 7681.412                    |
| 2                               | 7682.102                    |
| 3                               | 7682.094                    |
| 4                               | 7682.111                    |
| 5                               | 7681.564                    |
| 6                               | 7681.643                    |
| 7                               | 7682.204                    |
| 8                               | 7681.441                    |
| 9                               | 7681.742                    |
| 10                              | 7681.698                    |
| average                         | 7681.801                    |
| Standard deviation ( $\delta$ ) | 0.901                       |

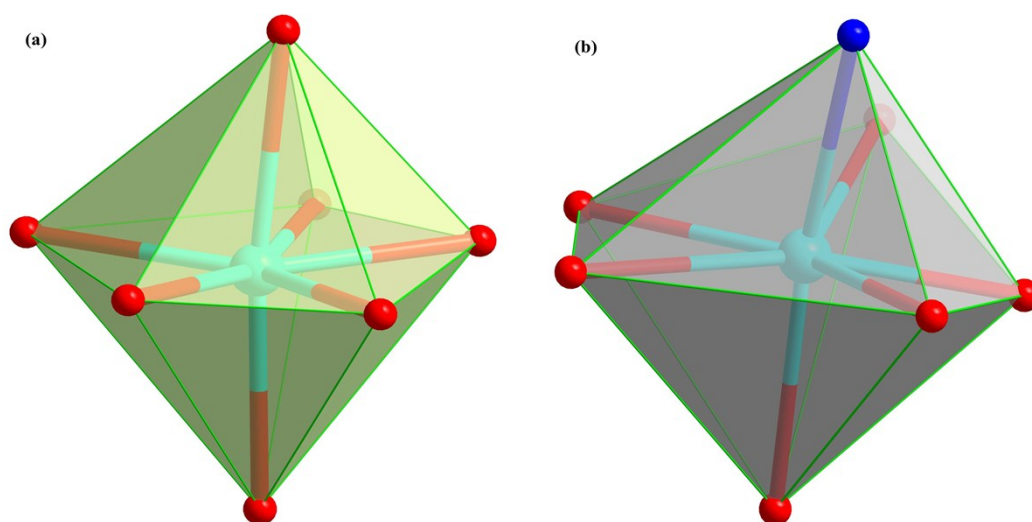

**Fig. S1** Coordination arrangement of  $\text{Cd}^{2+1}$  (a) and  $\text{Cd}^{2+2}$ ,  $\text{Cd}^{2+3}$  (b) ions could be described as a distorted pentagonal bipyramid.

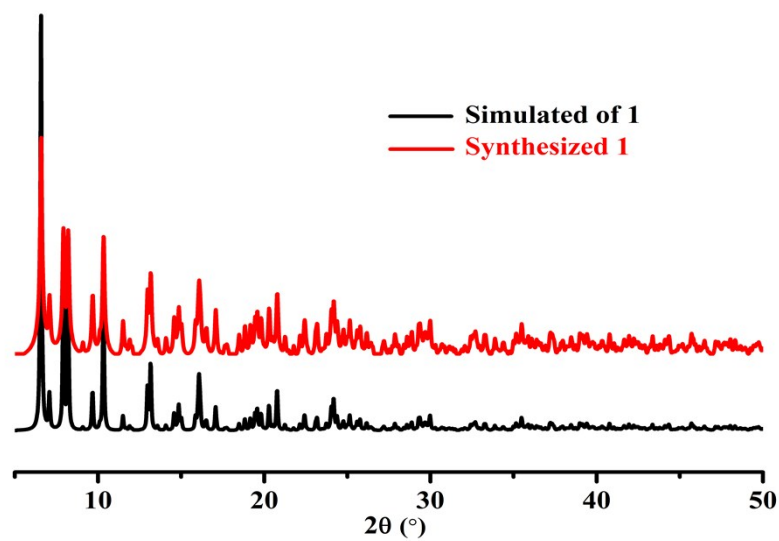

Fig. S2 PXRD patterns of complex 1 simulated from the X-ray single-crystal data and as-synthesized products.

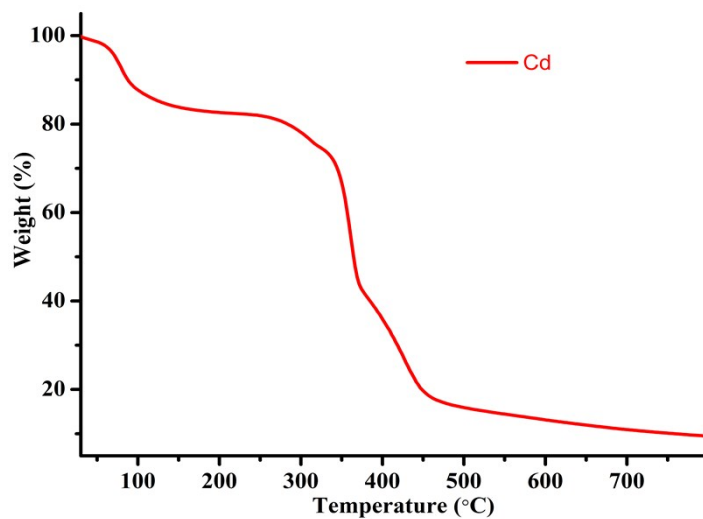

Fig. S3 The TGA curve of complex 1.

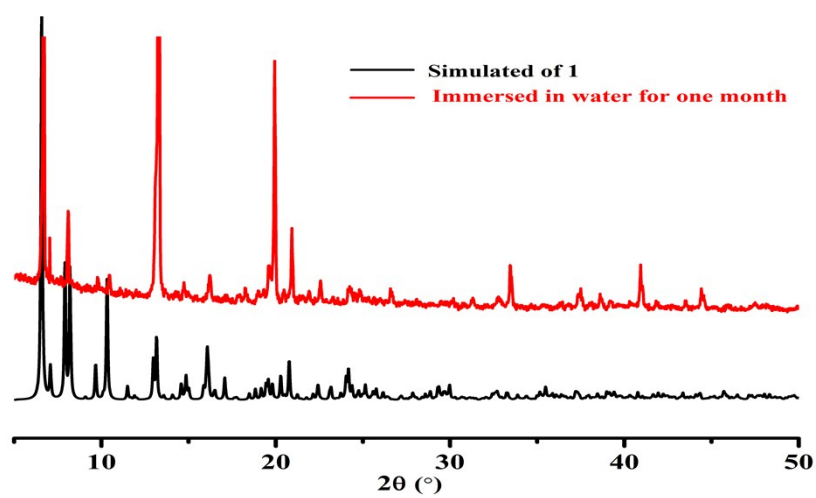

Fig. S4 PXRD patterns of 1 immersed in water at room temperature for one month.

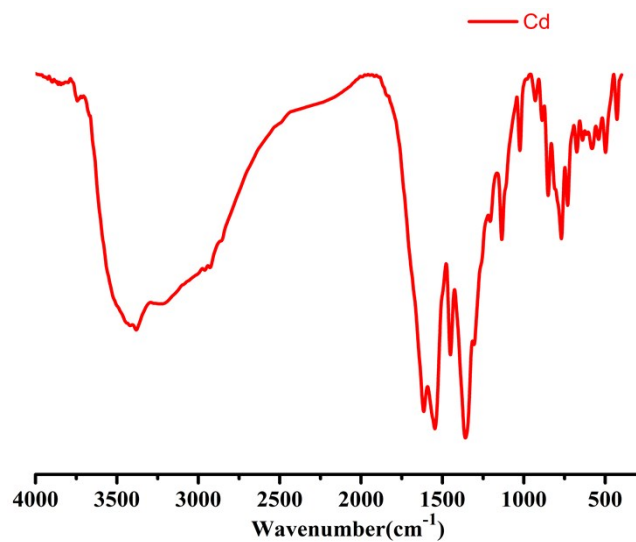

Fig. S5 The FT-IR spectra of complex 1.

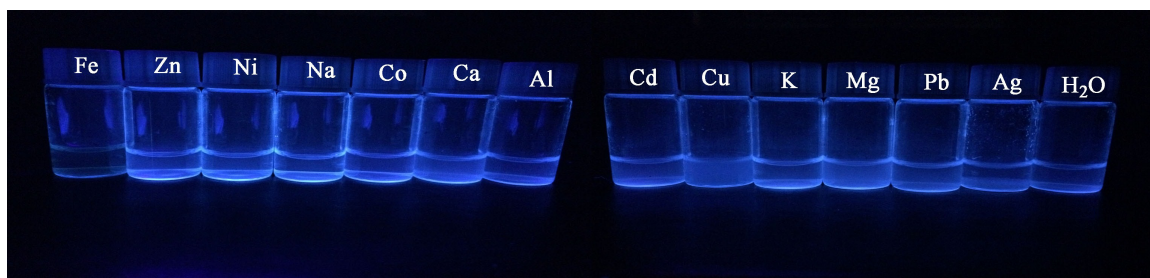

(a)

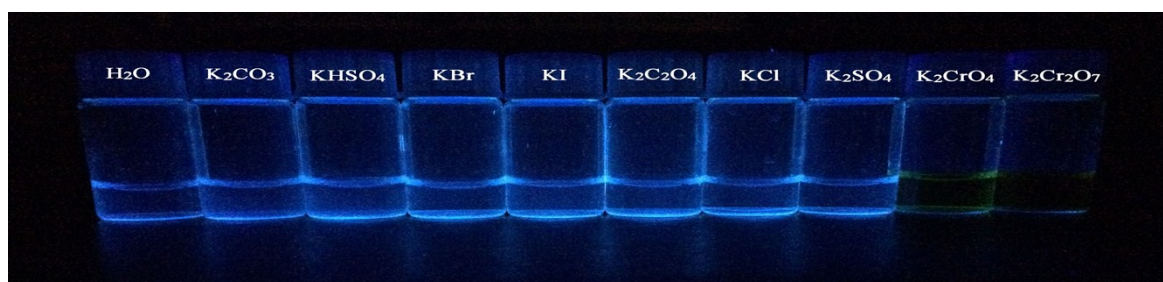

(b)

Fig. S6 (a) Pictures of different  $Mn^{2+}@1$  solutions ( $M = Cu^{2+}, Mg^{2+}, Al^{3+}, Cd^{2+}, Pb^{2+}, Co^{2+}, Ca^{2+}, Zn^{2+}, Na^{+}, K^{+}, Ni^{2+}, Ag^{+}$  and  $Fe^{3+}$  respectively); (b) Pictures of different  $1@A^{n-}$  solutions ( $A = Cr_2O_7^{2-}, CrO_4^{2-}, HSO_4^-, CO_3^{2-}, Br^-, Cl^-, I^-, C_2O_4^{2-}$  and  $SO_4^{2-}$  respectively).

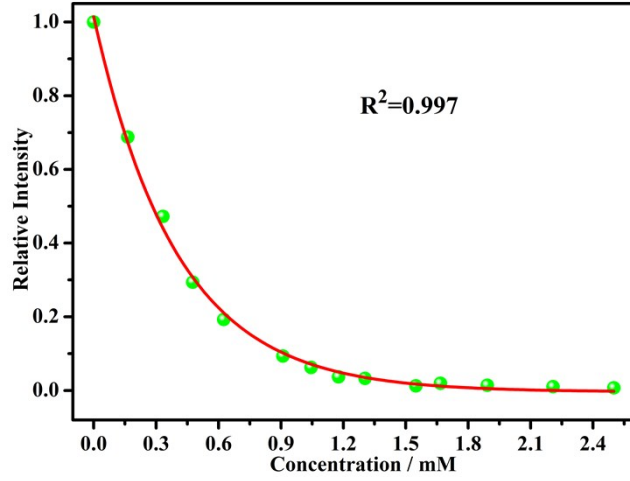

(a)  $\text{Fe}^{3+}$

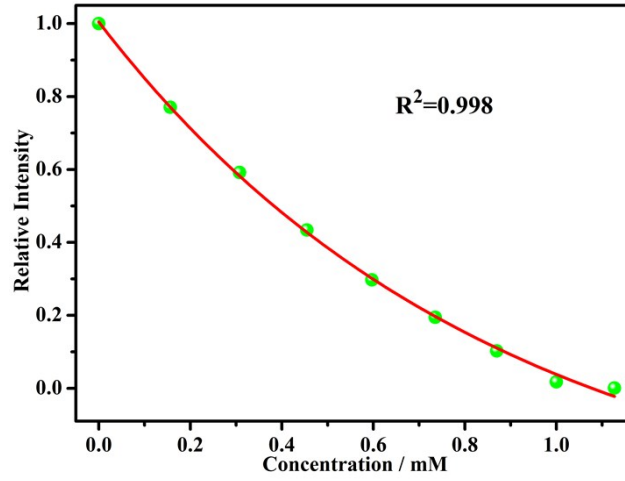

(b)  $\text{Cr}_2\text{O}_7^{2-}$

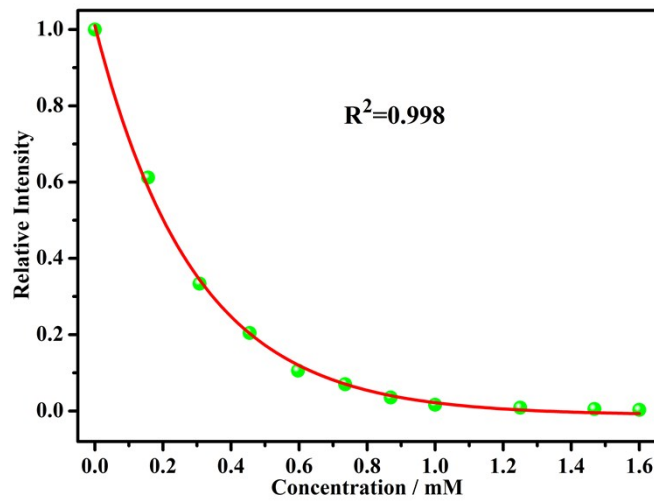

(c)  $\text{CrO}_4^{2-}$

**Figure S7** The linear correlation for the plot of  $I_0/I$  vs concentration of  $\text{Fe}^{3+}$  (a),  $\text{Cr}_2\text{O}_7^{2-}$  (b) and  $\text{CrO}_4^{2-}$  (c) ions, respectively, in low concentration range.

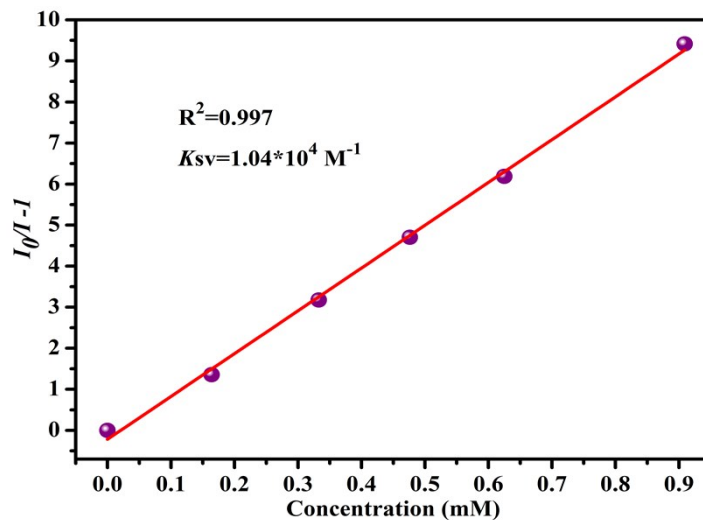

(a)  $\text{Fe}^{3+}$

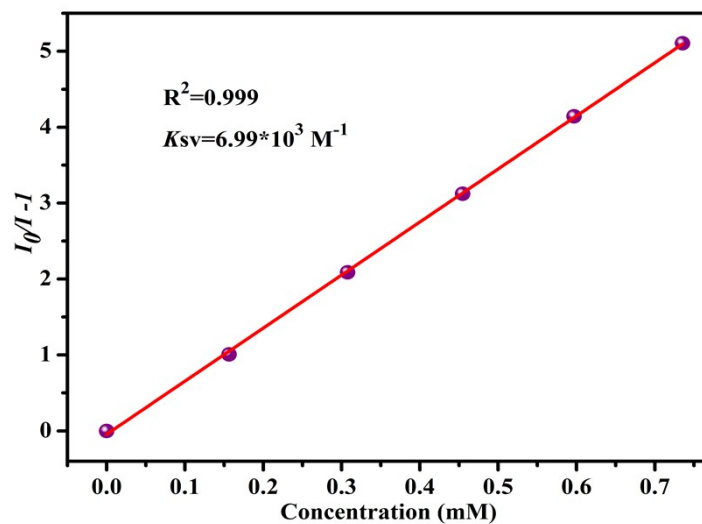

(b)  $\text{Cr}_2\text{O}_7^{2-}$

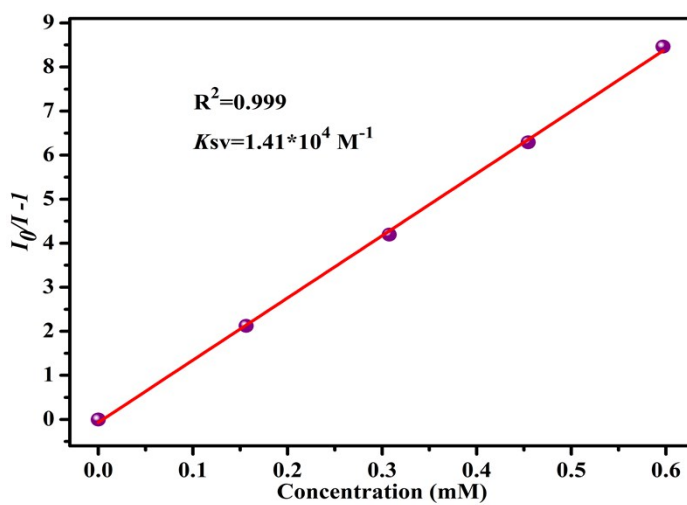

(c)  $\text{CrO}_4^{2-}$

**Fig. S8** Quenching efficiency defined by the Stern–Volmer relationship for  $\text{Fe}^{3+}$ ,  $\text{Cr}_2\text{O}_7^{2-}$  and  $\text{CrO}_4^{2-}$  ions.

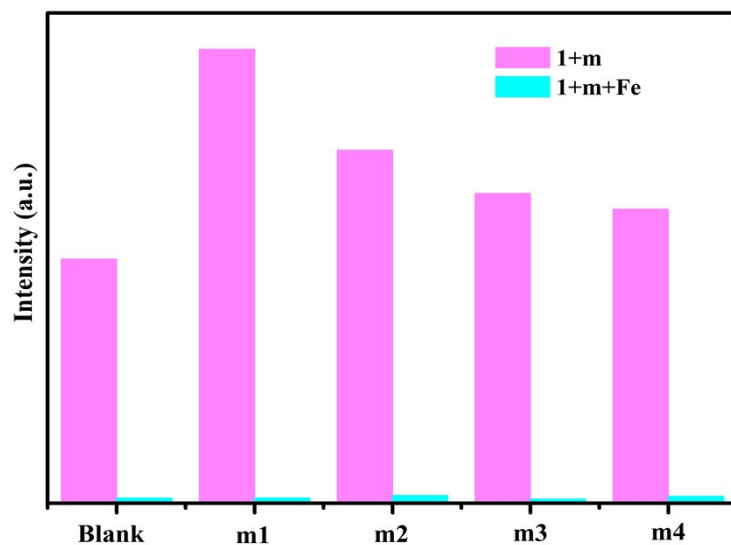

**Fig. S9** Luminescence intensity at 406 nm of **1** dispersed in water with addition of different mixed ions ( $10^{-2}$ M) mixed solution added  $\text{Fe}^{3+}$  ions ( $10^{-2}$  M) (m1:  $\text{Ag}^{2+}/\text{Pb}^{2+}$ ; m2:  $\text{Cu}^{+}/\text{K}^{+}/\text{Mg}^{2+}$ ; m3:  $\text{Al}^{3+}/\text{Cd}^{2+}/\text{Ca}^{2+}/\text{Co}^{2+}$ ; m4:  $\text{Na}^{+}/\text{Ni}^{2+}/\text{Zn}^{2+}$ ).

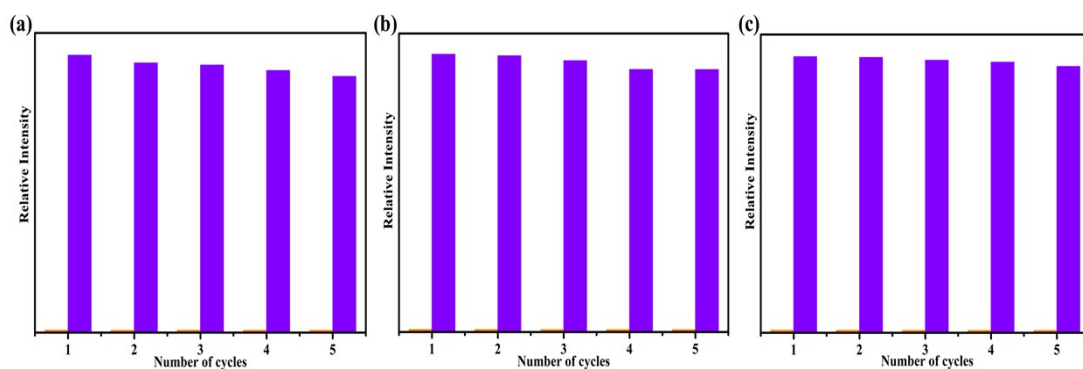

**Fig. S10** Luminescent intensity at 406 nm of **1** after five recycles in  $\text{Fe}^{3+}$ ,  $\text{CrO}_4^{2-}$  and  $\text{Cr}_2\text{O}_7^{2-}$  solutions ( $10^{-2}$  M).

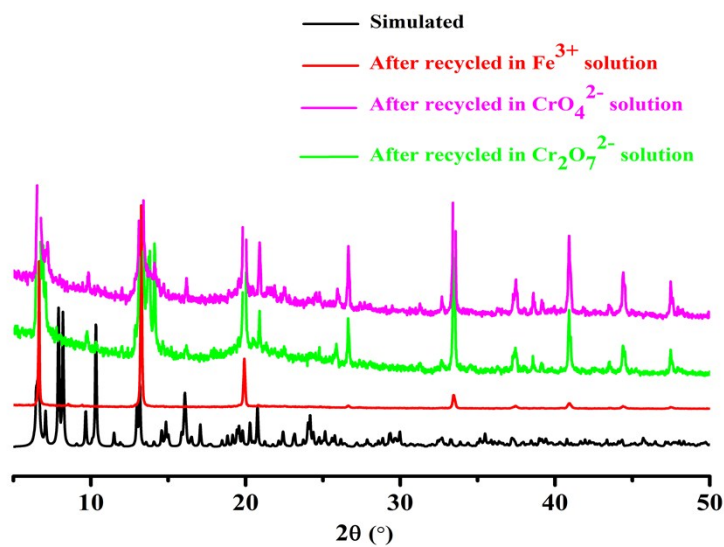

**Fig. S11** The PXRD patterns of **1** treated by  $\text{Fe}^{3+}$ ,  $\text{CrO}_4^{2-}$  and  $\text{Cr}_2\text{O}_7^{2-}$  aqueous solutions.



| Sample                                                                                           | Concentration of Cd <sup>2+</sup> ( ug/mL) |
|--------------------------------------------------------------------------------------------------|--------------------------------------------|
| Blank sample (H <sub>2</sub> O)                                                                  | 0.0196                                     |
| Initial solution after immersing in H <sub>2</sub> O                                             | 0.0228                                     |
| Final solution after recycle sensing experiment for Fe <sup>3+</sup>                             | 0.0212                                     |
| Final solution after recycle sensing experiment for CrO <sub>4</sub> <sup>2-</sup>               | 0.0201                                     |
| Final solution after recycle sensing experiment for Cr <sub>2</sub> O <sub>7</sub> <sup>2-</sup> | 0.0199                                     |

**Fig. S12** ICP experiments of **1** after immersing in different solution.

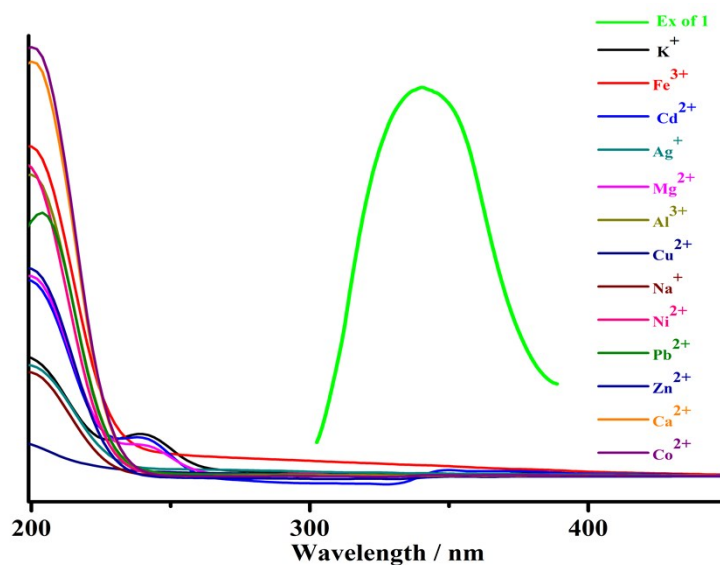

**Fig. S13** UV-Vis adsorption spectrum of M(NO<sub>3</sub>)<sub>n</sub> aqueous solution and the excitation spectrum of **1**.

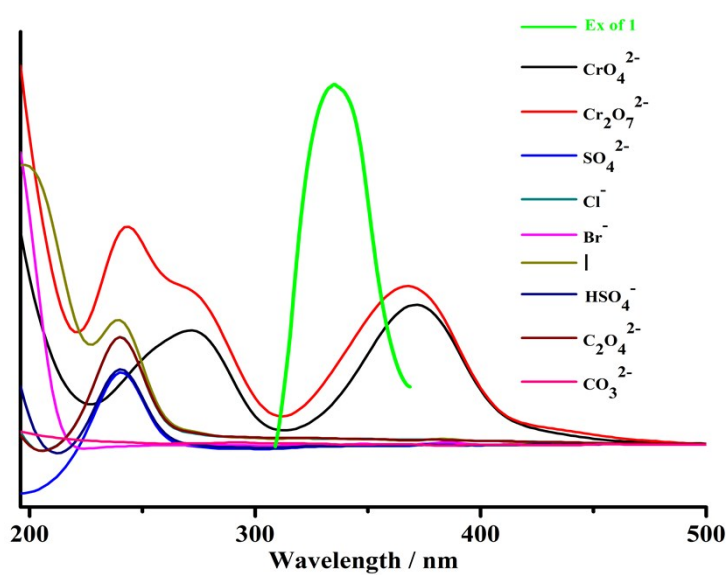

**Fig. S14** UV-Vis adsorption spectrum of K<sub>n</sub>(A) aqueous solution and the excitation spectrum of **1**.

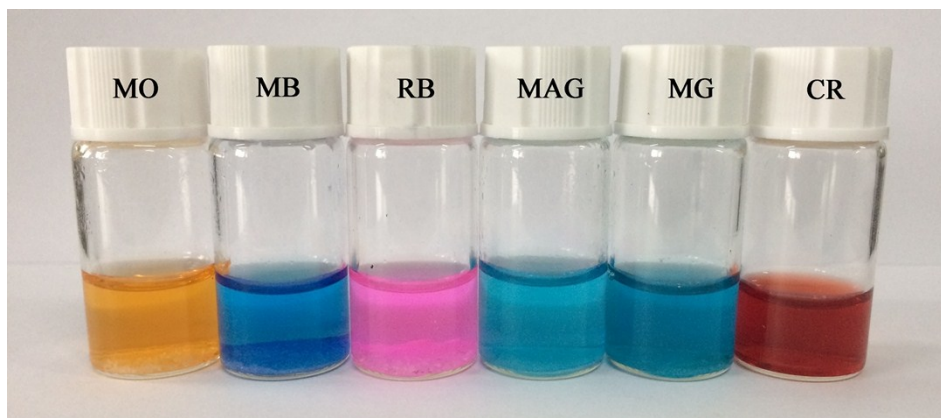

(a)

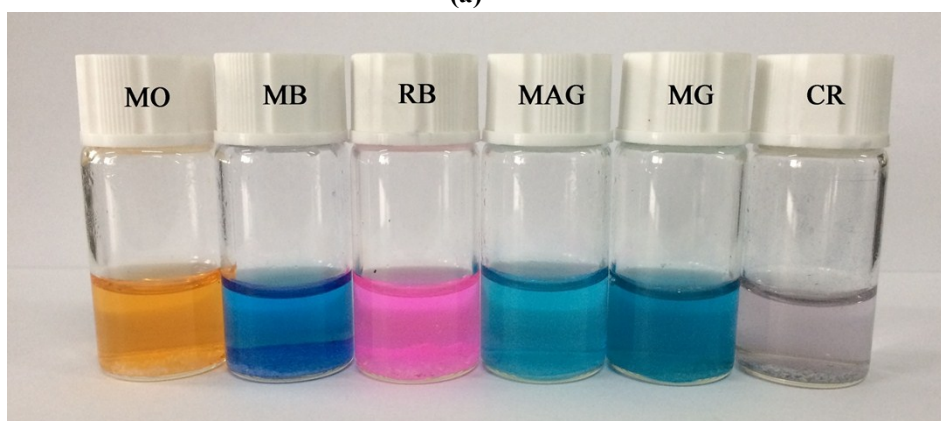

(b)

Fig. S15 Selective adsorption of CR with addition of **1** before (a) and after (b).

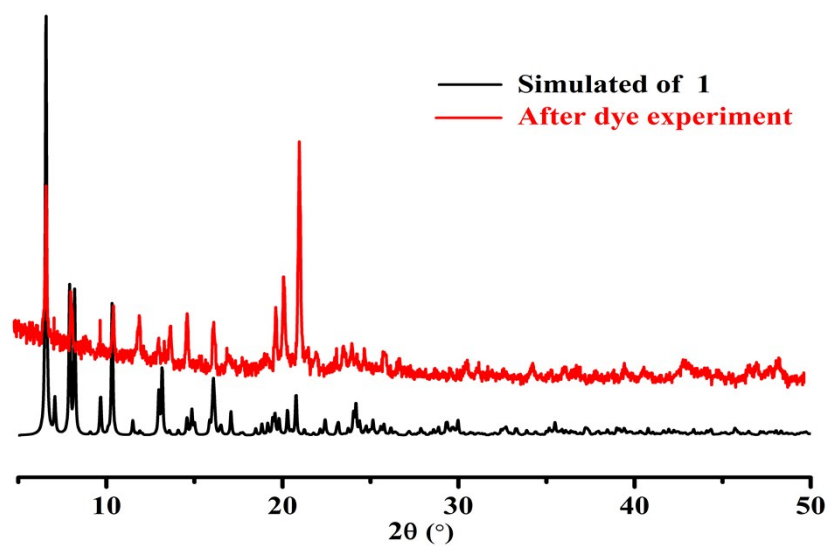

Fig. S16 PXRD powder diffraction patterns of **1** after dye experiment.
